# Supplementary material for: High-resolution observations of small-scale gravity waves and turbulence features in the OH airglow layer
Source: Copernicus journal article supplement (doi:10.5194/amt-9-5955-2016), 2016-12-12
Supplement: Supplementary file 1 [file amt-9-5955-2016-supplement.zip]

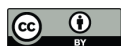

## *Supplement of*

# **High-resolution observations of small-scale gravity waves and turbulence features in the OH airglow layer**

**René Sedlak et al.**

*Correspondence to:* René Sedlak ([rene.sedlak@dlr.de](mailto:rene.sedlak@dlr.de))

- [amt-9-5955-2016-supplement-title-page.pdf](#)
- [video1.mpeg](#)
- [video2.mpeg](#)
- [video3.mp4](#)

The copyright of individual parts of the supplement might differ from the CC-BY 3.0 licence.
